# Supplementary material
Source: PubMed Central journal article supplement (PMC2951831)
Supplement: blood-2007-10-119438_1.pdf [file blood-2007-10-119438_1.pdf]

| Antibody Target                    | Functional Effect of Phosphorylation | Manufacturer     | Catalog# | Antibody Dilution | Antibody Source | 2nd Antibody dilution |
|------------------------------------|--------------------------------------|------------------|----------|-------------------|-----------------|-----------------------|
| Actin(beta)                        |                                      | Sigma            | A5441    | 2000              | mouse           | 20000                 |
| AKT                                |                                      | Cell Signaling   | 9272     | 250               | Rabbit          | 15000                 |
| AKT-P308(Thr)                      | Activation                           | Cell Signaling   | 9275     | 250               | Rabbit          | 15000                 |
| AKT-P473(Ser)                      | Activation                           | Cell Signaling   | 9271     | 250               | Rabbit          | 15000                 |
| Bad                                |                                      | Cell Signaling   | 9292     | 100               | Rabbit          | 15000                 |
| Bad-p112(Ser)                      | Inactivation                         | Cell Signaling   | 9291     | 100               | Rabbit          | 15000                 |
| Bad-p136(Ser)                      | Inactivation                         | Cell Signaling   | 9295     | 100               | Rabbit          | 15000                 |
| Bad-p155(Ser)                      | Inactivation                         | Cell Signaling   | 9297     | 100               | Rabbit          | 15000                 |
| Bak                                |                                      | Cell Signaling   | 3792     | 100               | Rabbit          | 15000                 |
| Bax                                |                                      | Cell Signaling   | 2772     | 200               | Rabbit          | 15000                 |
| Bcl2                               |                                      | DAKO             | M0887    | 500               | mouse           | 15000                 |
| Bcl-XL                             |                                      | Cell Signaling   | 2762     | 200               | Rabbit          | 15000                 |
| Catenin-beta                       |                                      | Cell Signaling   | 9562     | 250               | Rabbit          | 15000                 |
| Cyclin D1(H295)                    | Activation                           | Santa Cruz       | sc-753   | 600               | Rabbit          | 15000                 |
| DJ1                                |                                      | Private-Andreeff |          | 5000              | Rabbit          | 15000                 |
| Erk2                               |                                      | Santa Cruz       | Sc-154   | 10000             | Rabbit          | 15000                 |
| pERK2 [MAPK-p42/44(Thr202/Tyr204)] | Activation                           | Cell Signaling   | 9101     | 1000-1500         | Rabbit          | 15000                 |
| GSK3                               |                                      | santa Cruz       | sc-7291  | 750               | mouse           | 15000                 |
| GSK3a/B(p-ser21/9)                 | Inactivation                         | Cell Signaling   | 9331     | 200               | Rabbit          | 15000                 |
| MCL1                               |                                      | BD pharmingen    | 559027   | 200               | mouse           | 15000                 |
| MEK                                |                                      | Cell Signaling   | 9422     | 2000(1000)        | Rabbit          | 15000                 |
| MEK(p-ser217/221)                  | Activation                           | Cell Signaling   | 9121     | 1000              | Rabbit          | 15000                 |
| mTOR                               |                                      | Cell Signaling   | 2972     | 250               | Rabbit          | 15000                 |
| mTOR(p-Ser2448)                    | Activation                           | Cell Signaling   | 2971     | 250               | Rabbit          | 15000                 |
| Myc-C                              |                                      | Cell Signaling   | 9402     | 200-400           | Rabbit          | 15000                 |
| NRP1                               |                                      | Santa Cruz       | SC-5307  | 50(100)           | mouse           | 20000(15000)          |
| p27                                |                                      | Santa Cruz       | sc-528   | 100               | Rabbit          | 15000                 |
| p38-p-thr180/tyr182                | Activation                           | Cell Signaling   | 9211     | 100               | Rabbit          | 15000                 |
| p53                                |                                      | Cell Signaling   | 9282     | 3000              | Rabbit          | 15000                 |
| p70S6K                             |                                      | Cell Signaling   | 9202     | 750               | Rabbit          | 15000                 |
| p70S6K(p-thr389)                   | Activation                           | Cell Signaling   | 9205     | 250               | Rabbit          | 15000                 |
| PKCa                               |                                      | Upstate          | 05-154   | 2000              | mouse           | 20000                 |
| pKCa-p657(Ser)                     | Activation                           | Upstate          | 06-822   | 1000              | Rabbit          | 20000                 |
| PTEN                               |                                      | Upstate          | 07-016   | 1000              | Rabbit          | 15000                 |
| PTEN-p(380/382/383)                | Inactivation                         | Cell Signaling   | 9554     | 400               | Rabbit          | 15000                 |
| S6 Ribosomal                       |                                      | Cell Signaling   | 2212     | 250               | Rabbit          | 15000                 |

| <b>Antibody Target</b>                   | <b>Functional Effect of Phosphorylation</b> | <b>Manufacturer</b> | <b>Catalog#</b> | <b>Antibody Dilution</b> | <b>Antibody Source</b> | <b>2nd Antibody dilution</b> |
|------------------------------------------|---------------------------------------------|---------------------|-----------------|--------------------------|------------------------|------------------------------|
| protein                                  |                                             |                     |                 |                          |                        |                              |
| S6 Ribosomal protein (phosphoser235/236) | Activation                                  | Cell Signaling      | 2211            | 15000-20000              | Rabbit                 | 15000                        |
| S6 Ribosomal protein (phosphoser240/244) | Activation                                  | Cell Signaling      | 2215            | 750-1000                 | Rabbit                 | 15000                        |
| Smac/Diablo                              |                                             | Cell Signaling      | 2954            | 500                      | mouse                  | 15000                        |
| Src                                      |                                             | Upstate             | 05-184          | 600                      | mouse                  | 15000                        |
| Src(phosphoty527)                        | Inactivation                                | Cell Signaling      | 2105            | 400                      | Rabbit                 | 15000                        |
| SSBP2                                    |                                             | Private-Nagarajan   |                 | 1000                     | Rabbit                 | 15000                        |
| SSBP3                                    |                                             | Private-Nagarajan   |                 | 250                      | Rabbit                 | 15000                        |
| STAT1-p727(Ser)                          | Activation                                  | Cell Signaling      | 9171            | 250                      | Rabbit                 | 15000                        |
| STAT3                                    |                                             | Upstate             | 06-596          | 200                      | Rabbit                 | 15000                        |
| STAT3 p705(Tyr)                          | Activation                                  | Cell Signaling      | 9131            | 500                      | Rabbit                 | 15000                        |
| STAT3-p727(Ser)                          | Activation                                  | Cell Signaling      | 9134            | 200                      | Rabbit                 | 15000                        |
| STAT5-p694(Tyr)                          | Activation                                  | Cell Signaling      | 9351            | 100                      | Rabbit                 | 15000                        |
| Stat6(phosphoty641)                      |                                             | Cell Signaling      | 9361            | 100                      | Rabbit                 | 15000                        |
| Survivin                                 |                                             | Santa Cruz          | sc-10811        | 1000                     | Rabbit                 | 15000                        |
| XIAP                                     |                                             | Cell Signaling      | 2042            | 100                      | Rabbit                 | 15000                        |

Total and phospho proteins are listed with the phosphorylated amino acid denoted by the corresponding number and amino acid after the protein name.

P= protein, p=phospho protein.
